# Supplementary material
Source: publisher site journal article supplement (https://www.dovepress.com/article/365570)
Supplement: Supplementary file 1 [file get_supplementary_file.php]

**Supplementary data**

ORIGINAL RESEARCH

Jin Cao et al

**One-step fabrication of multifunctional PLGA-HMME-DTX@MnO2 nanoparticles for enhanced** **chemo-sonodynamic antitumor treatment**

Jin Cao1,#, Mingxue Zheng1.#, Zhenyan Sun1, Zhiye Li1, Xueyong Qi1,*, Song Shen1,*

1School of Pharmacy, Jiangsu University, 301 Xuefu Road, 212013, Zhenjiang, Jiangsu, P.R.China

#These authors contributed equally to this work.

*Correspondence: Song Shen; Xueyong Qi

School of Pharmacy, Jiangsu University, 301 Xuefu Road, 212013, Zhenjiang, Jiangsu, P.R.China

Tel +86-0511-88795939

Email [jsda.shensong@163.com](mailto:jsda.shensong@163.com); [qixyemail@163.com](mailto:qixyemail@163.com)


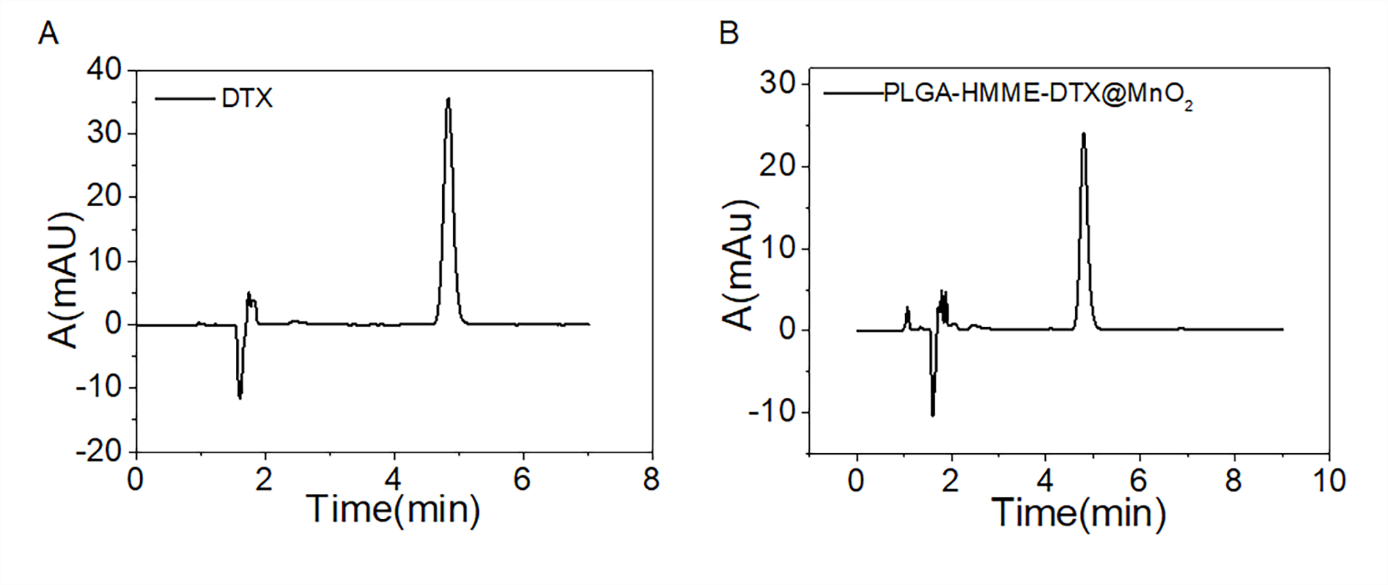


**Figure S1.** Chromatogram for DTX by HPLC. A) free DTX. B) DTX in PLGA-HMME-DTX@MnO2.


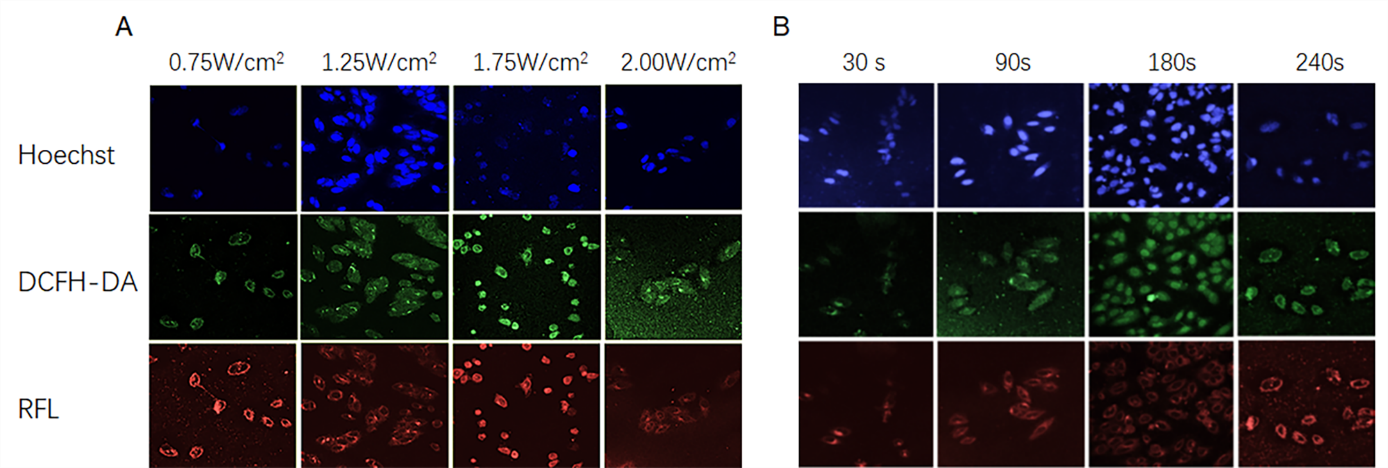


**Figure S2.** Cellular ROS generation in MCF-7 cells under different ultrasonic power (A), and with various duration (B).


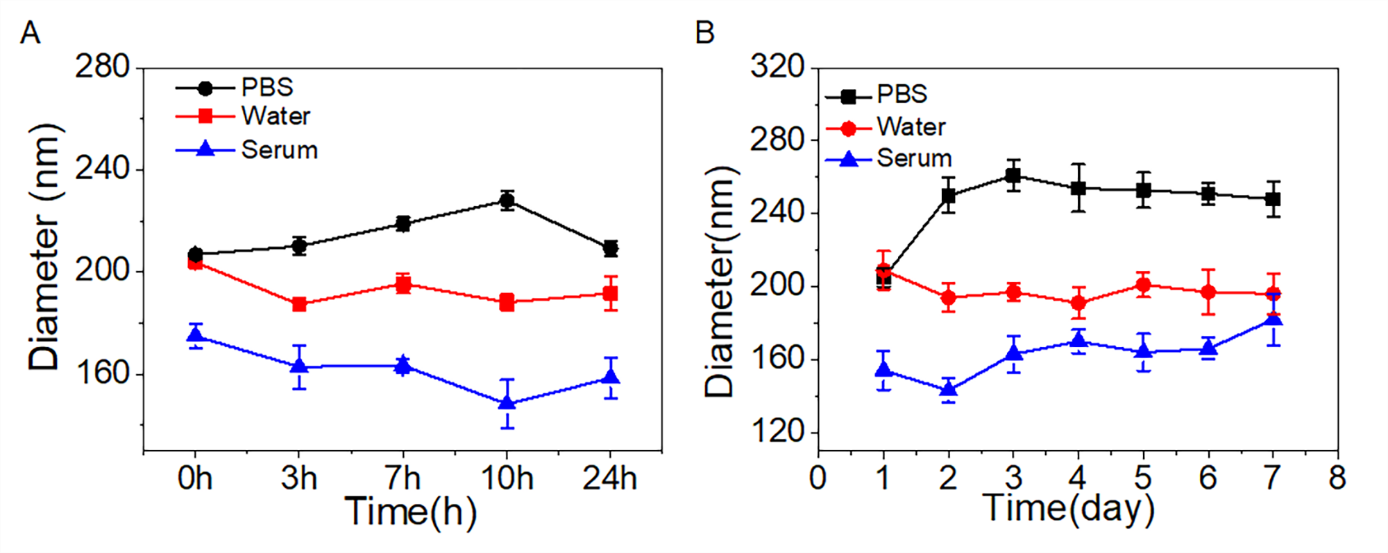


**Figure S3**. Particle size stability of PHD@MnO2 nanoparticles in different media. A) within 24 hours. B) within 7 days.

**Table S1. Body weights of mice in different groups**

| **Group** | **Control** | **US** | **HMME+US** | **PH+US** | **PHD** | **PHD+US** | **PHD@MnO2+US** |
| --- | --- | --- | --- | --- | --- | --- | --- |
| y 0 | 24.62±1.44 | 24.94±1.22 | 25.14±1.83 | 24.52±1.74 | 23.66±1.42 | 24.72±1.61 | 23.06±2.67 |
| Day 3 | 26.4±1.82 | 26.04±1.62 | 26.26±1.94 | 26.42±1.17 | 25.22±2.14 | 25.66±1.70 | 25.84±2.79 |
| Day 6 | 28.14±1.38 | 27.98±2.11 | 27.12±1.39 | 27.24±1.36 | 27.38±1.81 | 26.46±2.12 | 29.06±2.54 |
| Day 9 | 28.58±1.00 | 28.62±1.29 | 25.98±1.46 | 28.923±2.55 | 28.34±2.48 | 27.78±1.99 | 31.06±2.60 |
| Day 12 | 28.92±1.75 | 28.26±2.40 | 25.5±1.78 | 29.38±1.95 | 30.24±2.21 | 29.94±3.62 | 33.94±1.52 |
| Day 15 | 29.04±1.22 | 30.02±1.72 | 29.06±1.00 | 31.7±2.70 | 31.68±1.68 | 33.88±2.73 | 35.28±1.48 |

**Table S2. Tumor volumes of mice in different groups**

| **Group** | **Control** | **US** | **HMME+US** | **PH+US** | **PHD** | **PHD+US** | [**PHD@MnO2+US**](mailto:PHD@MnO2+US) |
| --- | --- | --- | --- | --- | --- | --- | --- |
| Day 0 | 172.6±99.2 | 161.6±74.5 | 121.6±37.3 | 208±103.7 | 153.4±129.5 | 132.1±81.3 | 91.7±32.9 |
| Day 3 | 618.7±117.1 | 457.7±121.3 | 166.3±30.5 | 351.6±115 | 325.4±131.4 | 232.4±111.6 | 101.1±38.2 |
| Day 6 | 689.8±238.2 | 592.2±214.7 | 228.5±190.5 | 490.2±277 | 401.4±292.6 | 247.4±95.4 | 120±40.2 |
| Day 9 | 812±258.7 | 718.2±377.8 | 289±28.4 | 539±252.9 | 544.8±339.4 | 498.1±263 | 251.8±150.7 |
| Day 12 | 1080.3±719.8 | 833.4±82.9 | 399.4±128.2 | 681.6±254.4 | 796.6±423.2 | 587.2±273.2 | 214±171 |
| Day 15 | 1895±483.5 | 1759±332.5 | 439.8±178.5 | 800.6±355.9 | 844.2±348.2 | 733.6±328.3 | 232.6±166.2 |
